# Supplementary material for: Durable and recyclable conjugated microporous polymer mediated controlled radical polymerization under white LED light irradiation
Source: Royal Society of Chemistry journal article supplement (doi:10.1039/d1py01241j), 2021-01-01
Supplement: d1py01241j1.pdf [file d1py01241j1.pdf]

## Electronic Supplementary Material (ESI)

### **Durable and recyclable conjugated microporous polymers mediated controlled radical polymerization under white LED light irradiation**

Longqiang Xiao,<sup>a,b</sup> Qiuyu Li,<sup>a</sup> Yabin Liu,<sup>a</sup> Xiaoling Fu,<sup>a</sup> Yulai Zhao,<sup>a</sup> Jingyu Cai,<sup>a,b</sup> Xiangyu Yin,<sup>a</sup> Linxi Hou<sup>a,c,\*</sup>

<sup>a</sup>Department of Materials-Oriented Chemical Engineering, School of Chemical Engineering, Fuzhou University, No. 2 Xueyuan Road, Fuzhou, 350116, P. R. China

<sup>b</sup>Qingyuan Innovation Laboratory, Quanzhou, Quanzhou, 362801, P. R. China

<sup>c</sup>Fujian Key Laboratory of Advanced Manufacturing Technology of Specialty Chemicals, Fuzhou University, No. 2 Xueyuan Road, Fuzhou, 350116, P. R. China

Corresponding authors: Linxi Hou (lxhou@fzu.edu.cn)

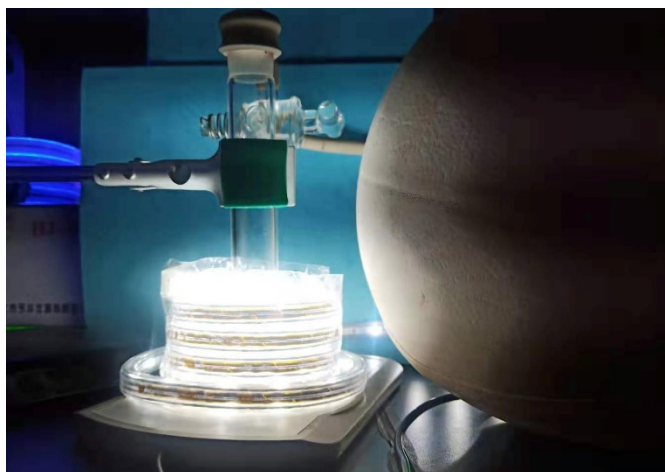

**Figure S1** Photo of the polymerization set-up.

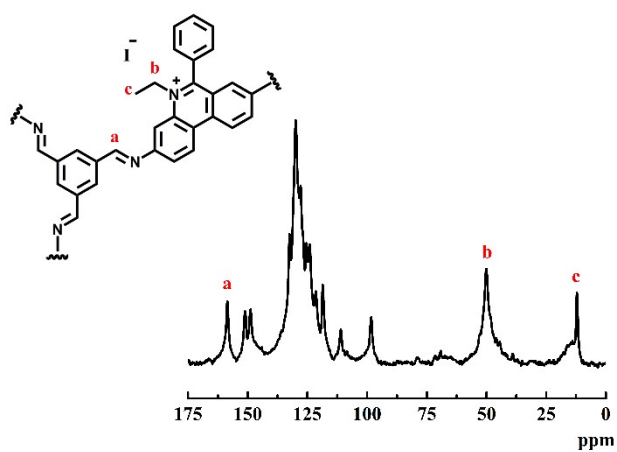

**Figure S2.** The  $^{13}\text{C}$  CP/MAS NMR spectrum of EI-CMP.

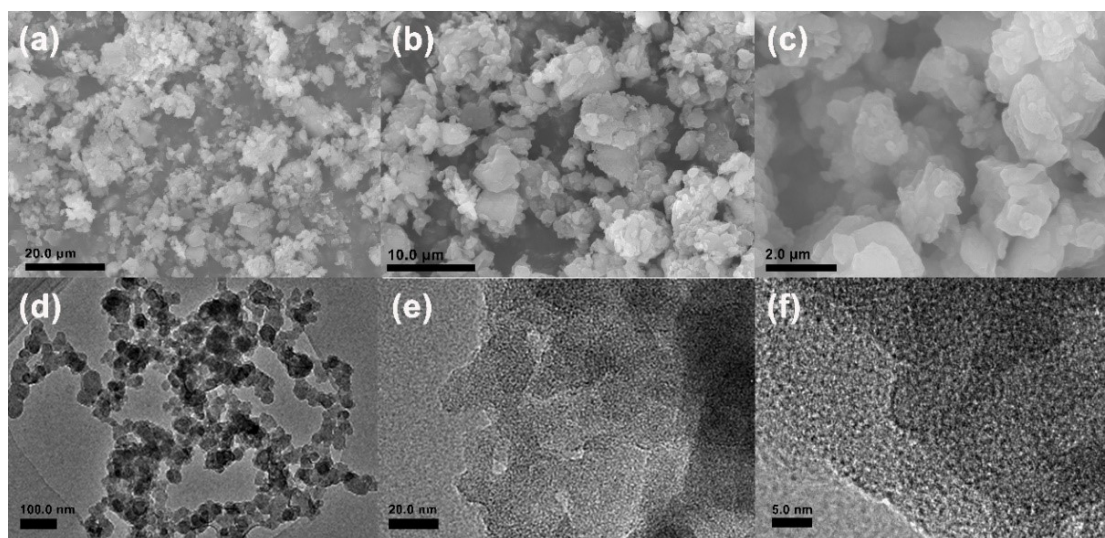

**Figure S3.** The SEM images (a-c) and TEM images (d-f) of EI-CMP.

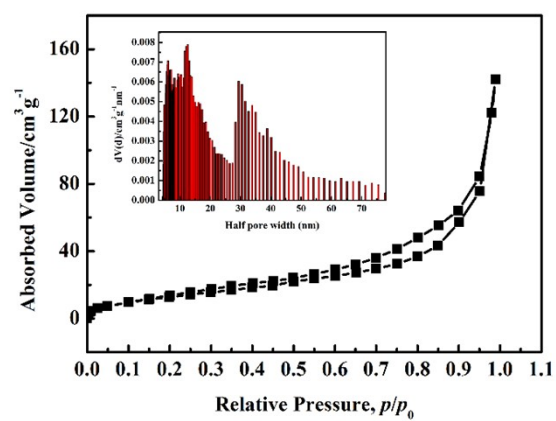

**Figure S4.** The N<sub>2</sub> adsorption and desorption isotherms of EI-CMP. Inset: The pore size distribution of EI-CMP.

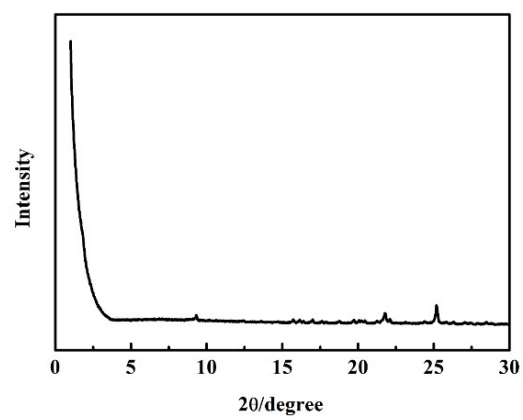

**Figure S5.** P-XRD pattern of EI-CMP.

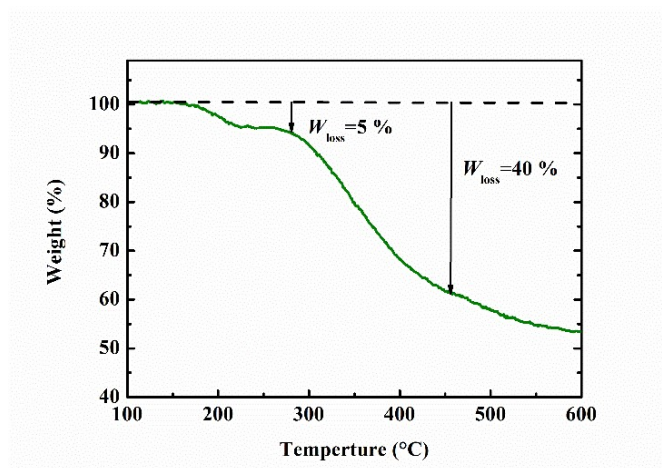

**Figure S6.** The TGA curve of EI-CMP [at the heating rate of 10 °C/min under N<sub>2</sub> (flow rate = 100 mL/min)].  $W_{\text{loss}}$  denotes the weight loss.

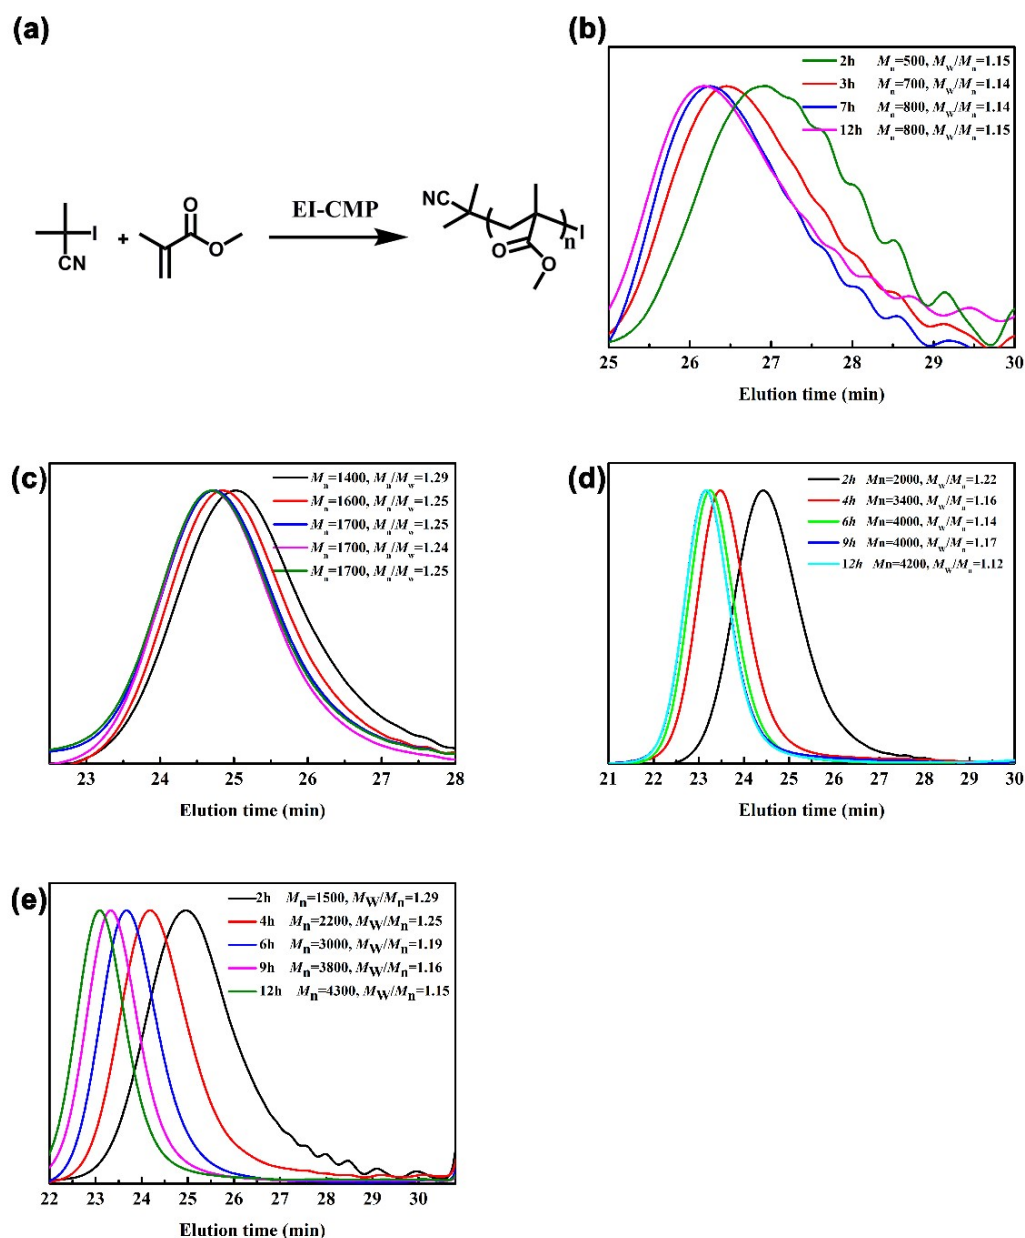

**Figure S7.** (a) Polymerization of MMA catalyzed by EI-CMP under white LED light irradiation. GPC traces of polymers obtained by using 0 mg (b), 5 mg (c), 10 mg (d) and 20 mg (e) of EI-CMP ( $[MMA]_0/[CP-I]_0=100$ ) under white LED light irradiation.

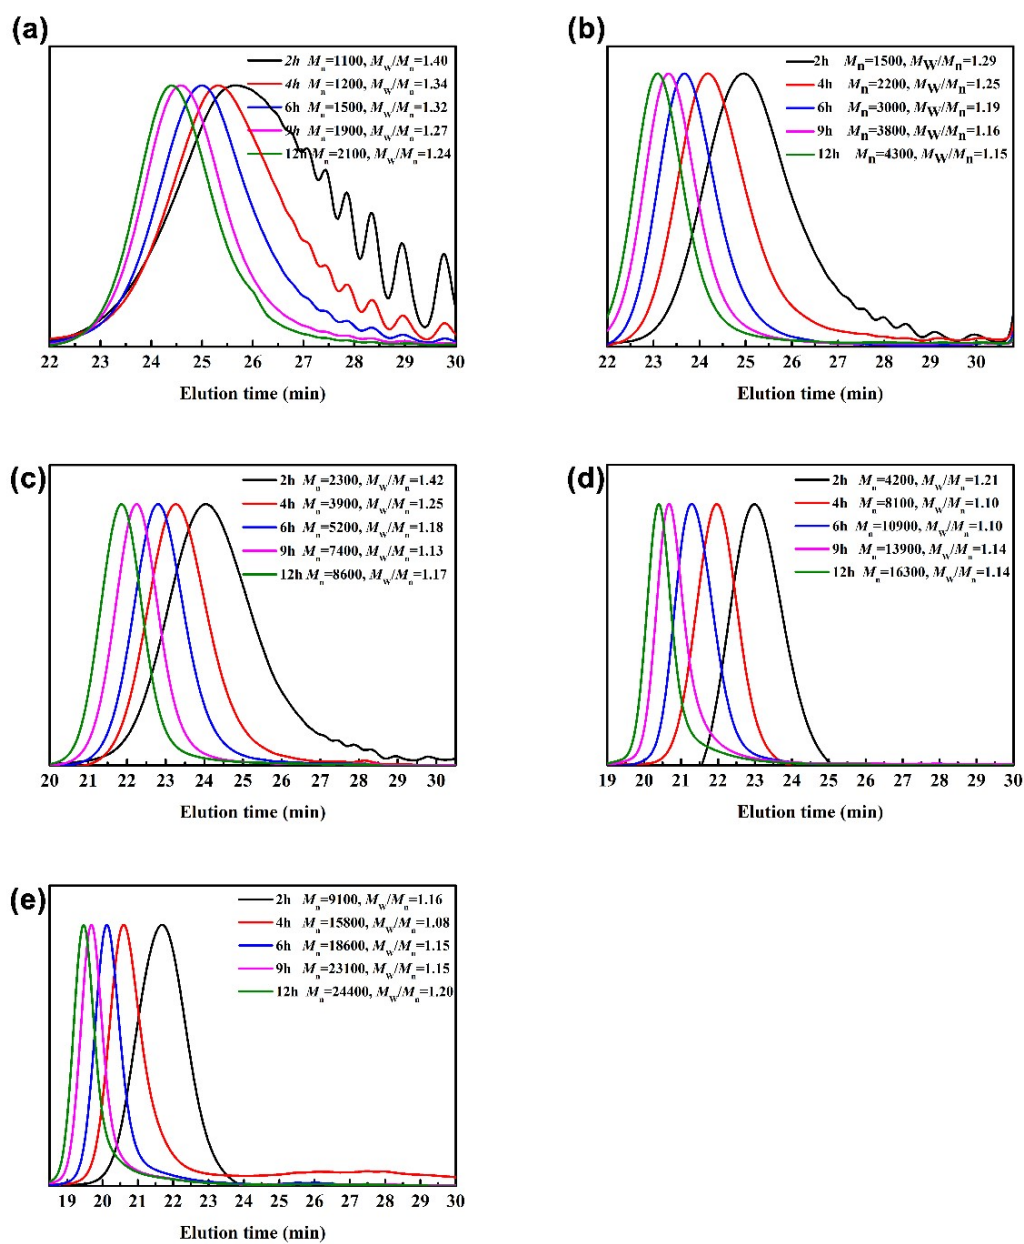

**Figure S8.** GPC traces of polymers obtained by using  $[MMA]_0/[CP-I]_0 = 50$  (a), 100 (b), 200 (c), 500 (d), 1000 (e) (20 mg of EI-CMP) under white LED light irradiation.



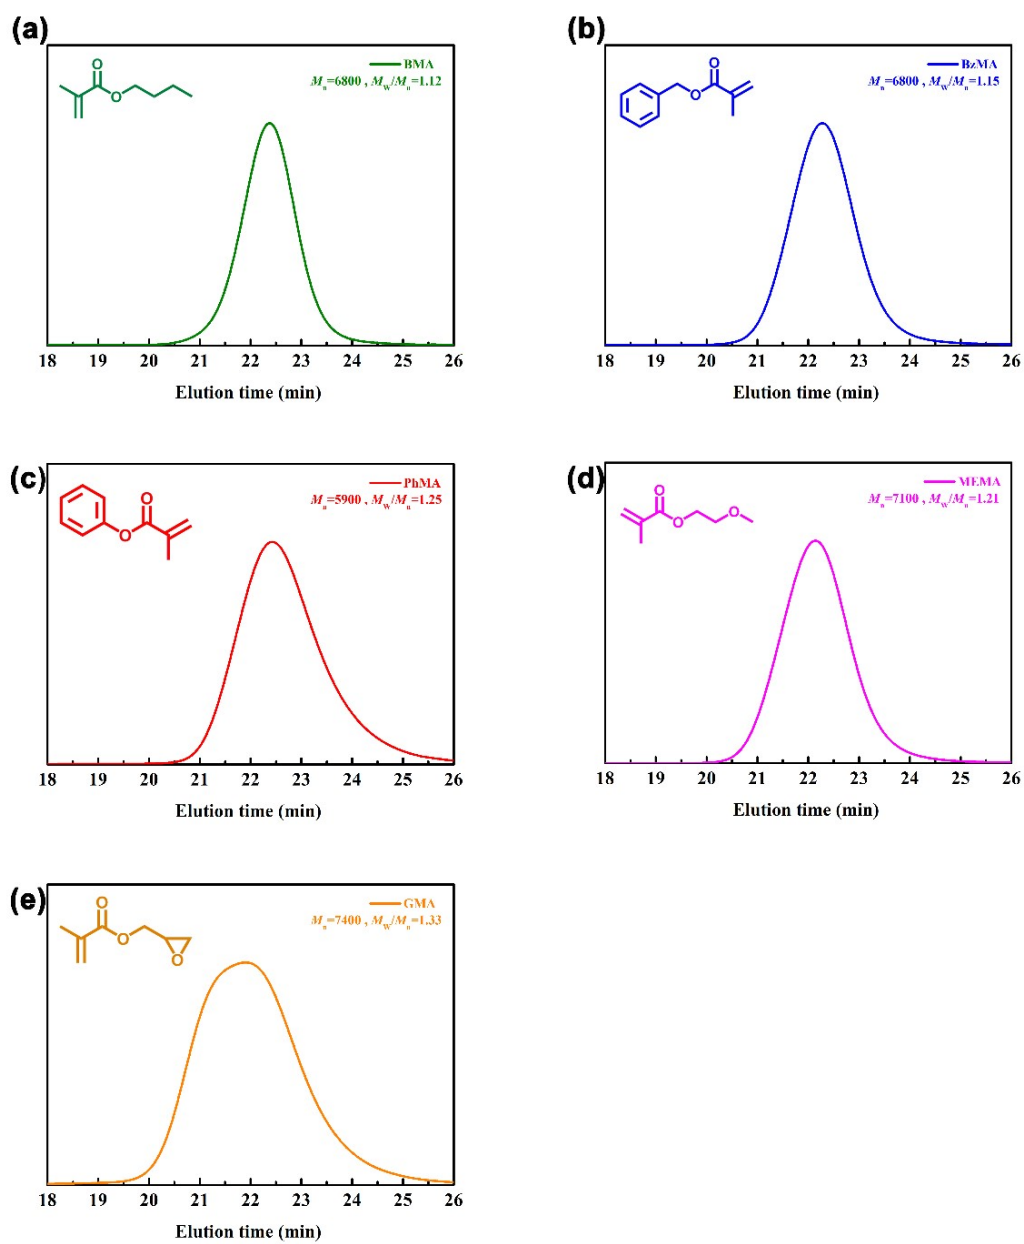

**Figure S9.** GPC traces of polymers obtained from different monomers.

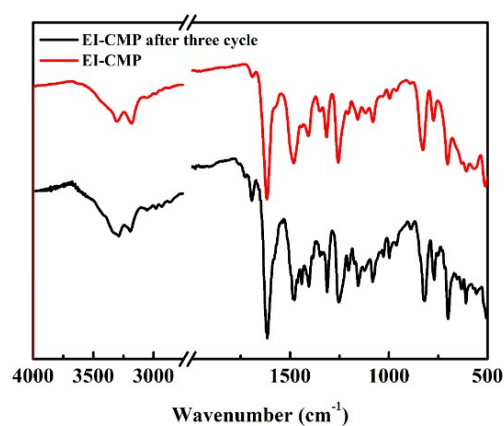

**Figure S10.** FT-IR spectra of newly prepared EI-CMP and recycled EI-CMP (3rd).

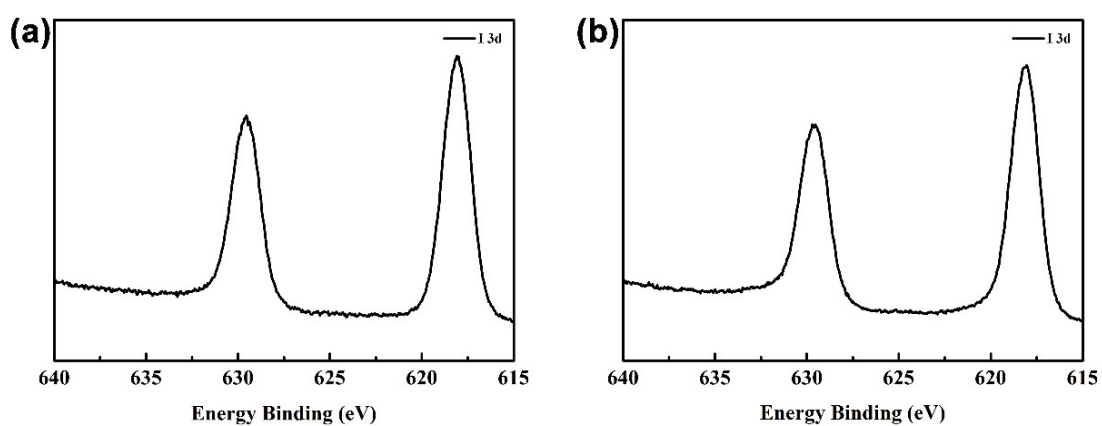

**Figure S11.** XPS spectra of I 3d of newly prepared EI-CMP and recycled EI-CMP (3rd).

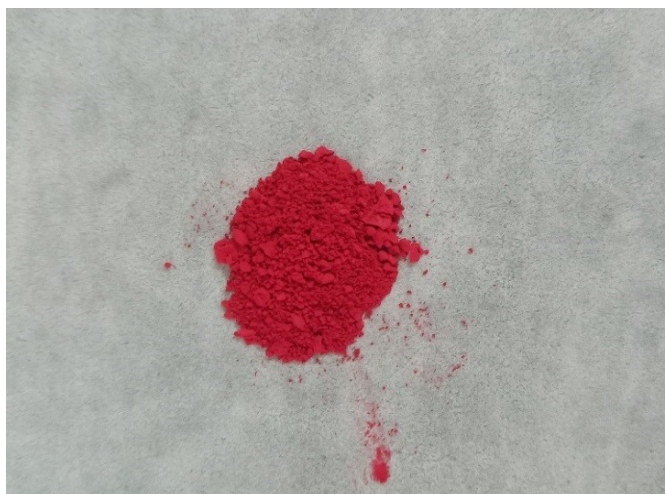

**Figure S12.** The photography of EI-CMP.

## Reference

- 1 J. Sarkar, L. Xiao, A. Goto, *Macromolecules*, 2016, **49**, 5033-5042.
- 2 Z. Lu, X. Fu, H. Yang, Y. Zhao, L. Xiao, L. Hou, *Polym. Chem.*, 2021, **12**, 183-188.
